# Supplementary material
Source: HighWire-hosted journal article supplement (http://www.ajnr.org/highwire/filestream/52660/field_highwire_adjunct_files/0/4117_table.pdf)
Supplement: 4117_table.pdf [file 4117_table.pdf]

**On-line Table: Ordinal regression for good outcomes (mRS 0–1) at 3 months**

| Factor                             | Odds Ratio and 95% CI | Wald $\chi^2$ | P Value |
|------------------------------------|-----------------------|---------------|---------|
| Age (per yr)                       | 1.052 (1.020–1.084)   | 10.710        | .001    |
| NIHSS score at onset (per patient) | 1.128 (1.057–1.203)   | 13.244        | .000    |
| Sex                                | 1.320 (0.627–2.781)   | 0.535         | .465    |
| Hypertension                       | 0.938 (0.446–1.976)   | 0.028         | .867    |
| Diabetes mellitus                  | 0.672 (0.302–1.495)   | 0.990         | .330    |
| Atrial fibrillation                | 0.652 (0.304–1.397)   | 1.210         | .271    |
| Recanalization                     | 2.275 (1.062–4.873)   | 4.475         | .034    |
| Modified Tan method                | 2.547 (1.222–5.309)   | 6.221         | .013    |
| Miteff method                      | 2.985 (1.406–6.337)   | 8.104         | .004    |
| Maas method                        | 1.874 (0.783–4.482)   | 1.992         | .158    |
| ASPECTS method                     | 1.140 (1.070–1.214)   | 4.686         | .030    |
